# Supplementary material for: Facile synthesis of chitosan-capped ZnS quantum dots as an eco-friendly fluorescence sensor for rapid determination of bisphenol A in water and plastic samples
Source: Royal Society of Chemistry journal article supplement (doi:10.1039/c3ra47868h), 2014-01-01
Supplement: c3ra47868h1.pdf [file c3ra47868h1.pdf]

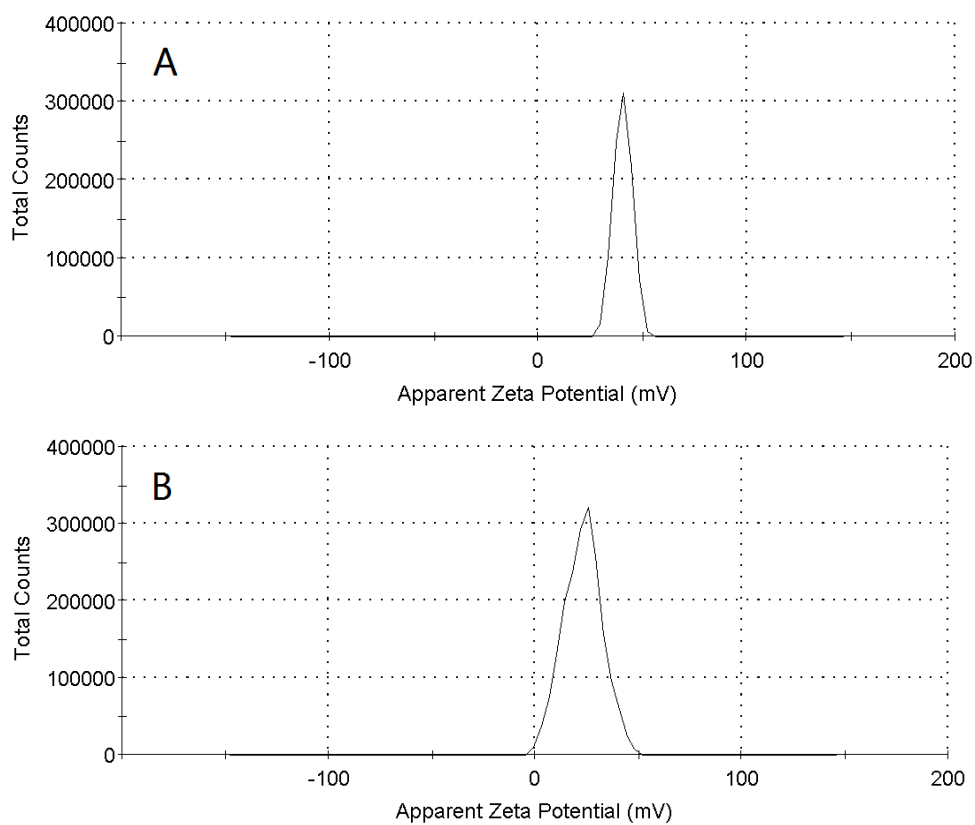

Fig. S1. The zeta potential of chitosan-capped ZnS QDs ( $1.2 \times 10^{-6} \text{ mol}\cdot\text{L}^{-1}$ ) (A) and BPA ( $300 \mu\text{g}\cdot\text{L}^{-1}$ ) (B). Both A and B were tested in 1% acetic aqueous solution.

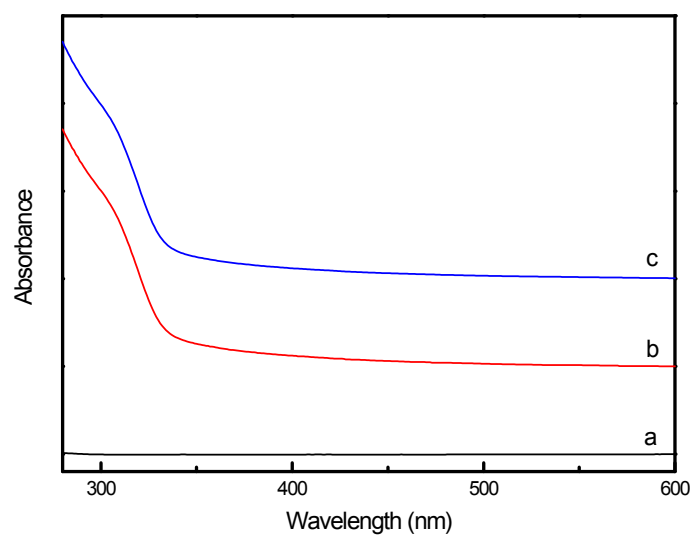

Fig. S2. UV-vis absorption spectra of BPA (a), ZnS QDs (b) and ZnS QDs + BPA (c). The concentrations of ZnS QDs and BPA were respectively  $1.2 \times 10^{-6} \text{ mol}\cdot\text{L}^{-1}$  and  $300 \mu\text{g}\cdot\text{L}^{-1}$ .

Table S1 Peak assignments in FTIR spectra of pure chitosan and chitosan-capped ZnS QDs

| Peak frequency (cm <sup>-1</sup> ) |                         | Peak assignments             |
|------------------------------------|-------------------------|------------------------------|
| Chitosan                           | Chitosan-capped ZnS QDs |                              |
| ~3434                              | ~3396                   | O—H and N—H stretching       |
| 2878                               | 2878                    | C—H stretching               |
| 1653                               | 1647                    | C=O stretching               |
| 1602                               | 1611                    | N—H bending                  |
| 1420                               | 1424                    | O—H bending                  |
| 1379                               | 1380                    | C—H bending (acetyl)         |
| 1320                               | 1332                    | C—N bending                  |
| 1264                               | 1261                    | C <sub>2</sub> —H stretching |
| 1157                               | 1157                    | C—O—C stretching             |
| 1090                               | 1083                    | C <sub>3</sub> —O stretching |
| 1035                               | 1035                    | C <sub>6</sub> —O stretching |

Table S2 Comparison results of different methods for detection of BPA

| Method                   | Apparatus                   | Pretreatment                                     | LOD ( $\mu\text{g}\cdot\text{L}^{-1}$ ) | Ref                    |
|--------------------------|-----------------------------|--------------------------------------------------|-----------------------------------------|------------------------|
| HPLC                     | HPLC-DAD                    | Liquid-phase microextraction                     | 0.20                                    | Tan et al., 2012       |
| LC/MS                    | CSLC/EMS                    | Column-switching/Semi-microcolumn                | 0.50                                    | Motoyama et al., 1999  |
| GC/MS                    | GC/MS                       | Solid-phase microextraction                      | 0.01                                    | Mudiam et al., 2011    |
| ELISA                    | ELISA reader                | Preparation of haptens and polyclonal antibodies | 2.50                                    | Lu et al., 2012        |
| CE                       | CE/DAD                      | Cloud point extraction                           | 0.50                                    | Zhong et al., 2011     |
| Electrochemical method   | Electrochemical workstation | Electrode modification                           | 1.83                                    | Yu et al., 2011        |
| Chemiluminescence method | Chemiluminescence analyzer  | -                                                | 18.3                                    | Lu et al., 2010        |
| QCM                      | Quartz crystal microbalance | -                                                | 1.00                                    | Li et al., 2004        |
| Colorimetric method      | UV-vis spectrometer         | -                                                | 0.10                                    | Mei et al., 2013       |
| SPR biosensor            | SPR analysis system         | Antigen conjugation                              | 0.08                                    | Hegnerova et al., 2010 |
| Liposome chromatography  | Fluorescence spectrometer   | Antigen conjugation                              | 0.10                                    | Liu et al., 2006       |
| Fluorescence method      | Fluorescence spectrometer   | -                                                | 2.00                                    | Fan et al., 2007       |
| Fluorescence method      | Fluorescence spectrometer   | -                                                | 0.23                                    | Kuang et al., 2010     |
| Fluorescence method      | Fluorescence spectrometer   | -                                                | 0.08                                    | This work              |

Notes: DAD, diode-array detector; CSLC/EMS, column-switching semi-microcolumn liquid chromatography/electrospray mass spectrometry.

Table S3 Interference of coexisting substances on the fluorescence intensity of chitosan-capped ZnS QDs with BPA

| Substances                       | Tolerance ratios | Changes of fluorescence intensity (%) | Substances                   | Tolerance ratios | Changes of fluorescence intensity (%) |
|----------------------------------|------------------|---------------------------------------|------------------------------|------------------|---------------------------------------|
| K <sup>+</sup>                   | 1000             | +3.1                                  | NO <sub>3</sub> <sup>-</sup> | 1000             | +2.0                                  |
| Na <sup>+</sup>                  | 1000             | +1.8                                  | Cl <sup>-</sup>              | 1000             | -1.9                                  |
| Al <sup>3+</sup>                 | 1000             | +3.9                                  | Mn <sup>2+</sup>             | 600              | -4.5                                  |
| Ca <sup>2+</sup>                 | 1000             | +2.6                                  | Zn <sup>2+</sup>             | 100              | +4.7                                  |
| Ba <sup>2+</sup>                 | 1000             | +4.4                                  | Fe <sup>3+</sup>             | 20               | -4.0                                  |
| NH <sub>4</sub> <sup>+</sup>     | 1000             | +3.5                                  | Cu <sup>2+</sup>             | 5                | -4.4                                  |
| Mg <sup>2+</sup>                 | 1000             | +4.3                                  | Hg <sup>2+</sup>             | 5                | -4.1                                  |
| CO <sub>3</sub> <sup>2-</sup>    | 1000             | -3.1                                  | Ag <sup>+</sup>              | 50               | -4.6                                  |
| SO <sub>4</sub> <sup>2-</sup>    | 1000             | +2.4                                  | glucose                      | 500              | +4.9                                  |
| PO <sub>4</sub> <sup>3-</sup>    | 1000             | -3.7                                  | lactose                      | 500              | +4.2                                  |
| CH <sub>3</sub> COO <sup>-</sup> | 1000             | +1.5                                  | glycine                      | 700              | +4.1                                  |

Notes: BPA, 25.0 µg·L<sup>-1</sup>; ZnS QDs, 1.2 × 10<sup>-6</sup> mol·L<sup>-1</sup>.
